# Supplementary material for: High Energy Intake Induced Overexpression of Transcription Factors and Its Regulatory Genes Involved in Acceleration of Hepatic Lipogenesis: A Rat Model for Type 2 Diabetes
Source: MDPI journal article supplement (doi:10.3390/biomedicines7040076), 2019-09-27
Supplement: s1 [file s1]

## Supplementary Table

**Table S1.** High Fat Diet (HFD) composition

| Ingredients                                                            | Weight in gm (per Kg) |
|------------------------------------------------------------------------|-----------------------|
| Powdered normal pellet diet [Nutrivet Life Science, Pune, M.S., India] | 700                   |
| Lard oil [Pune, M.S., India]                                           | 300                   |

**Table S2.** Primer sequences of selected RT-PCR genes

| S.No.                              | Target Genes                                            | Primers | Sequence               |
|------------------------------------|---------------------------------------------------------|---------|------------------------|
| <b>Housekeeping Gene</b>           |                                                         |         |                        |
| 1                                  | <i>Glyceraldehyde-3-phosphate dehydrogenase</i>         | Forward | AGTTCAACGGCACAGTCAAG   |
|                                    |                                                         | Reverse | TACTCAGCACCAGCATCACC   |
| <b>Transcription Factors</b>       |                                                         |         |                        |
| 1                                  | <i>Sterol Regulatory Element-Binding Proteins</i>       | Forward | AAACCTGAAGTGGTAGAAAC   |
|                                    |                                                         | Reverse | TTATCCTCAAAGGCTGGG     |
| 2                                  | <i>Peroxisome Proliferator-Activated Receptor Gamma</i> | Forward | AAGACAACAGACAAATCACC   |
|                                    |                                                         | Reverse | CAGGGATATTTTTGGCATACTC |
| 3                                  | <i>Nuclear Factor-<math>\kappa</math>B</i>              | Forward | AAAAACGAGCCTAGAGATTG   |
|                                    |                                                         | Reverse | ACATCCTCTTCCTTGTCTTC   |
| <b>Fatty Acid Metabolism Genes</b> |                                                         |         |                        |
| 1                                  | <i>Fatty Acid Synthase</i>                              | Forward | AAAAGGAAAGTAGAGTGTGC   |
|                                    |                                                         | Reverse | GACACATTCTGTTCACACAG   |
| 2                                  | <i>Acetyl-CoA Carboxylase Alpha</i>                     | Forward | AGCAGTATTTGAACACATGG   |
|                                    |                                                         | Reverse | CAGTTCCAAGAAGTAGAAGC   |
| 3                                  | <i>Malonyl CoA: ACP Acyltransferase</i>                 | Forward | AAAACCTCTAGGCTCAATCAAC |
|                                    |                                                         | Reverse | GGATGTGTGTATTTATGCCC   |
| 4                                  | <i>acyl-CoA Synthetase Long-chain family member 1</i>   | Forward | ACATTATGAACGATTGCTCC   |
|                                    |                                                         | Reverse | GCATTACACACTCTACAACG   |
| 5                                  | <i>Carnitine Palmitoyltransferase 1A</i>                | Forward | CACTGATGAAGGAAGAAGAC   |
|                                    |                                                         | Reverse | CCAGTCACTCACGTAATTTG   |
| 6                                  | <i>Fatty Acid Binding Protein</i>                       | Forward | TGGAGGGTGACAATAAAATG   |
|                                    |                                                         | Reverse | TCATGGTATTGGTGATTGTG   |

| Inflammatory Marker |                                                   |         |                       |
|---------------------|---------------------------------------------------|---------|-----------------------|
| 1                   | <i>Tumor Necrosis Factors-<math>\alpha</math></i> | Forward | CTCACACTCAGATCATCTTC  |
|                     |                                                   | Reverse | GAGAACCTGGGAGTAGATAAG |

**Table S3.** Biochemical estimation before initiation of HFD diet

| Biochemical parameters               | Healthy control (HC) | High fat diet control (HFDC) | Diabetic control (DC) |
|--------------------------------------|----------------------|------------------------------|-----------------------|
| Glucose (mg/dl)                      | 96.82 $\pm$ 11.24    | 95.75 $\pm$ 17.18            | 89.13 $\pm$ 7.23      |
| <b>Lipid profile (mg/dl)</b>         |                      |                              |                       |
| Total cholesterol                    | 53.00 $\pm$ 15.31    | 70.57 $\pm$ 18.04            | 47.28 $\pm$ 13.63     |
| Triglycerides                        | 7.350 $\pm$ 2.34     | 11.00 $\pm$ 6.30             | 7.367 $\pm$ 1.12      |
| HDL- cholesterol                     | 12.23 $\pm$ 6.95     | 21.20 $\pm$ 7.70             | 22.18 $\pm$ 12.92     |
| LDL- cholesterol                     | 26.75 $\pm$ 5.74     | 19.58 $\pm$ 6.07             | 25.67 $\pm$ 10.80     |
| VLDL- cholesterol                    | 1.450 $\pm$ 0.48     | 1.600 $\pm$ 0.72             | 1.483 $\pm$ 0.22      |
| <b>Liver Function Test (Unit/ml)</b> |                      |                              |                       |
| SGOT                                 | 39.97 $\pm$ 6.66     | 24.58 $\pm$ 3.02             | 32.88 $\pm$ 24.07     |
| SGPT                                 | 30.13 $\pm$ 6.56     | 32.45 $\pm$ 3.82             | 29.85 $\pm$ 13.28     |
| <b>Kidney Function Test (mg/dl)</b>  |                      |                              |                       |
| Creatinine                           | 1.167 $\pm$ 0.68     | 0.7167 $\pm$ 0.19            | 0.9500 $\pm$ 0.51     |
| Urea                                 | 29.87 $\pm$ 10.19    | 27.78 $\pm$ 3.27             | 27.62 $\pm$ 4.34      |

Results are recorded as the mean of three replicates and denoted as mean  $\pm$  SD (n=6 animals per groups). All values for HFDC and DC groups were non-significantly different as compared with the healthy control group (Dunnett Multiple Comparisons Test). LDL: Low-density lipoprotein, VLDL: Very low-density lipoprotein, HDL: High-density lipoprotein, SGOT: Serum glutamic oxaloacetic transaminase, SGPT: Serum glutamic pyruvic transaminase.

**Table S4.** The efficiency of qRT-PCR for relative quantification of mRNA. Efficiency is calculated from the slope of the curve as  $E = 10(-1/\text{slope})^{-1}$

| Sr.No.                             | Target Genes                                            | Symbol                             | Efficiency |
|------------------------------------|---------------------------------------------------------|------------------------------------|------------|
| <b>Housekeeping Gene</b>           |                                                         |                                    |            |
| 1                                  | <i>Glyceraldehyde-3-phosphate dehydrogenase</i>         | <i>GAPDH</i>                       | 86.29      |
| <b>Transcription Factors</b>       |                                                         |                                    |            |
| 1                                  | <i>Sterol Regulatory Element-Binding Proteins-1c</i>    | <i>SREBP-1c</i>                    | 95.60      |
| 2                                  | <i>Peroxisome Proliferator-Activated Receptor Gamma</i> | <i>PPAR-<math>\gamma</math></i>    | 104.66     |
| 3                                  | <i>Nuclear Factor-<math>\kappa\beta</math></i>          | <i>NF-<math>\kappa\beta</math></i> | 83.88      |
| <b>Fatty Acid Metabolism Genes</b> |                                                         |                                    |            |
| 1                                  | <i>Fatty Acid Synthase</i>                              | <i>FASN</i>                        | 80.56      |
| 2                                  | <i>Acetyl-CoA Carboxylase Alpha</i>                     | <i>ACACA</i>                       | 86.79      |
| 3                                  | <i>Malonyl CoA: ACP Acyltransferase</i>                 | <i>MCAT</i>                        | 85.54      |
| 4                                  | <i>acyl-CoA Synthetase Long-chain family member 1</i>   | <i>ACSL 1</i>                      | 86.26      |
| 5                                  | <i>Carnitine Palmitoyltransferase 1A</i>                | <i>CPT 1A</i>                      | 88.57      |
| 6                                  | <i>Fatty Acid Binding Protein</i>                       | <i>FABP</i>                        | 87.59      |
| <b>Inflammatory Markers</b>        |                                                         |                                    |            |
| 1                                  | <i>Tumor Necrosis Factors-<math>\alpha</math></i>       | <i>TNF-<math>\alpha</math></i>     | 100.79     |

S

#### upplementary Figure

**Figure S1.** HFD with 30 % lard oil fed rats showed glucose intolerance

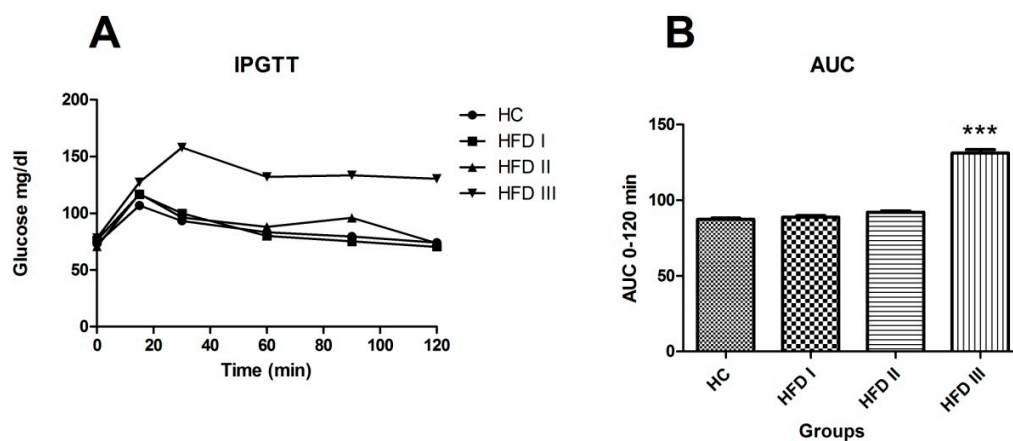

A: Variations in glucose levels during IPGTT

B: Area under curve (AUC) for IPGTT. Results are recorded as the mean of three replicates and denoted as mean  $\pm$  SE (n=6 animals per groups). \*\*\*p $\leq$ 0.001, when compared with the healthy control group (Dunnett Multiple Comparisons Test). HC: Healthy control, HFD I: 10 % lard oil, HFD II: 20 % lard oil and HFD III: 30% lard oil group.

**Figures S2.** Animals weights of experimental groups during experiment

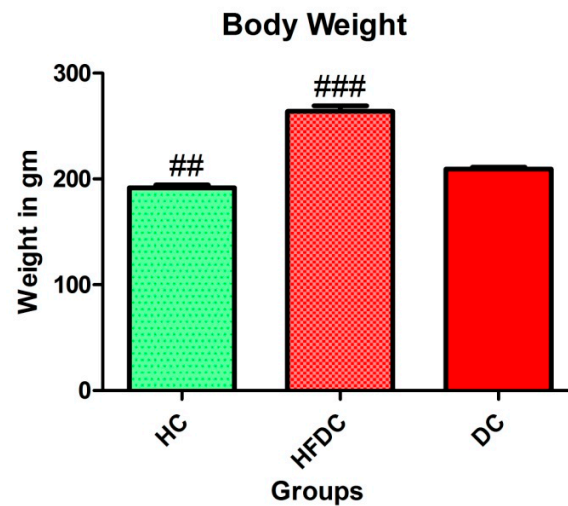

Results are recorded as the mean of three replicates and denoted as mean  $\pm$  SE. ##p $\leq$ 0.01 and ###p $\leq$ 0.001, when compared with the diabetic control group (Dunnett Multiple Comparisons Test). HC: Healthy control, HFD: High fat diet control, DC: Diabetes control.
